# Supplementary material
Source: ML conference proceedings conference paper supplement (https://openaccess.thecvf.com/content/ICCV2025/html/Li_Tensor-aggregated_LoRA_in_ICCV_2025_paper.html)
Supplement: Supplementary file 1 [file Li_Tensor-aggregated_LoRA_in_ICCV_2025_supplemental.pdf]

## A. Scalability discussion

We compare client and server computation complexity (Client/Server Comp.) and communication costs for upload and download (UL/DL Comm. cost).

| Method         | Client Comp. | Server Comp.                           | Comm. cost          |
|----------------|--------------|----------------------------------------|---------------------|
| FlexLoRA       | $O(rd^2)$    | $O(Kdr^2 + Kd^2 + d^3)$                | UL: $2rd$ DL: $2rd$ |
| FLoRA          | $O(rd^2)$    | $O(Krd^2)$                             | UL: $2rd$ DL: $d^2$ |
| Te-LoRA (Ours) | $O(rd)$      | $O(K^2rd + Kr^2d + K^2r^2d) + O(Kr^2)$ | UL: $rd$ DL: $rd$   |

Table A. Computation complexity

Since (rank)  $r \ll d$ , our Te-LoRA greatly reduces client computation and communication cost. With  $K = 10$  (clients) and  $d = 4096$  (LoRA matrix  $\in \mathbb{R}^{d \times r}$ ), it is also efficient on the server side for small ( $< 100$ ) and medium ( $100 - 1000$ ) scales, but loses advantage when  $K > d$  in large-scale settings.

## B. More baselines

For the heterogeneous LoRA scenario, most existing methods have been thoroughly compared in the original paper, as this is a key issue addressed in our work. To enrich results, we include additional baselines (Table B). Te-LoRA outperforms FFA-LoRA, which trains only the B matrix, and LoRA-A<sup>2</sup>, which uses score-based rank selection with alternating freezing, in both homogeneous and heterogeneous settings.

| Method              | MMLU          |               | MT-Bench      |             |
|---------------------|---------------|---------------|---------------|-------------|
| Heter / Homo        | Wizard        | Dolly         | Alpaca-GPT4   | Wizard      |
| FFA-LoRA            | 21.11         | 25.83         | 43.62         | 3.13        |
| LoRA-A <sup>2</sup> | 23.52 / 22.92 | 27.93 / 27.91 | 45.50 / 45.20 | 3.26 / 3.21 |
| Te-LoRA (Ours)      | 23.71 / 23.35 | 28.37 / 28.44 | 46.16 / 45.86 | 3.33 / 3.31 |

Table B. More baselines

## C. Convergence analysis

### Theoretical Assumptions

**Lipschitz continuity:** Assume that the model’s loss function is  $L$ -Lipschitz continuous with respect to the parameters  $\theta$  and is bounded, such that the change in loss due to small perturbations of the parameters is controlled. Here,  $L$  is the Lipschitz constant, and  $|\theta| \leq R$ , where  $R$  is the radius of the parameter space.

**Bounded alignment and tensor errors:** Assume that the alignment error  $\psi$  (from PAA) and tensor error  $\tau$  (from T2M) are bounded within a constant range.

### Convergence Theorem

Under the aforementioned assumptions, let the sample size per client be  $N$ , the number of clients be  $K$ , and the total dimension of the LoRA parameters be  $\mathcal{P}$ . After applying

ing PAA+T2M aggregation, the generalization error (or expected risk difference) of the model satisfies the following:

$$\mathcal{E}(\hat{\theta}) = O\left(L(\psi + \tau) + \sqrt{\frac{\mathcal{P} \ln \frac{R}{(\psi + \tau)}}{|K|N}}\right) \quad (1)$$

Thus, with high probability, the generalization error comprises two components: the approximation error  $O(\psi + \tau)$  induced by alignment/tensor errors, and the statistical error term  $O\left(\sqrt{\frac{\mathcal{P} \ln \frac{R}{(\psi + \tau)}}{|K|N}}\right)$ . This result preserves the dependency structure of the generalization error concerning the sample size, number of clients, parameter dimension, and errors.

### Key Points of Deduction

**Local perturbation error:** From the Lipschitz property, we know that if the parameter vectors differ by  $\Delta\theta$ , then the change in loss is at most  $O(L|\Delta\theta|)$ . Therefore, when the alignment error and tensor error are combined into  $|\Delta\theta| = O(\psi + \tau)$ , the resulting model error is  $O(L(\psi + \tau))$ .

**Coverage and statistical error:** Assume that the parameter space can be regarded as a  $k$ -dimensional sphere with radius  $R$  and  $\varepsilon$ -net coverage number  $|N| = O\left(\frac{R}{\varepsilon}\right)^{\mathcal{P}}$ . Combining Hoeffding’s concentration inequality, parallel estimation for all  $\theta$  yields a generalisation error term of  $O\left(\sqrt{\frac{\mathcal{P} \ln \frac{R}{\varepsilon}}{|K|N}}\right)$ .

### Sample Complexity

Let the generalization error target be  $\epsilon$  (ignoring the alignment error term), which must satisfy  $\sqrt{\frac{\mathcal{P} \ln \frac{R}{(\psi + \tau)}}{|K|N}} \approx O(\epsilon)$ . The sample size required for a single client is  $N = O\left(\frac{\mathcal{P}}{|K|\epsilon^2} \ln \frac{R}{\psi + \tau}\right)$ .
